# Supplementary material for: Equilibrium Isotherms, Kinetics, and Thermodynamic Mechanisms of a Novel Polyacrylamide-Strychnos potatorum Seed-Derived Activated Carbon Composite for Aqueous Hardness Removal
Source: Hindawi journal article supplement (doi:10.1155/2022/3774106), 2022-09-24

**Equilibrium isotherms, kinetics, and thermodynamic mechanisms of novel polyacrylamide-*Strychnos potatorum* seed derived activated carbon composite for aqueous hardness removal**

**Supplementary Information**

1. **Determination of isotherms parameters**

Freundlich isotherm

y = axby = qex = Cea =KFb = nF

**For the total Hardness**

| **Ce** (**mg/L)** | **qe(mg/g)** |
| --- | --- |
| 29.394574 | 14.2032488 |
| 55.80629 | 28.4046892 |
| 123.2058125 | 54.59842885 |
| 169.861134 | 82.2318648 |
| 223.4008 | 110.2934088 |
| 485.552332 | 216.3520369 |
| 1131.229326 | 548.5755102 |

**
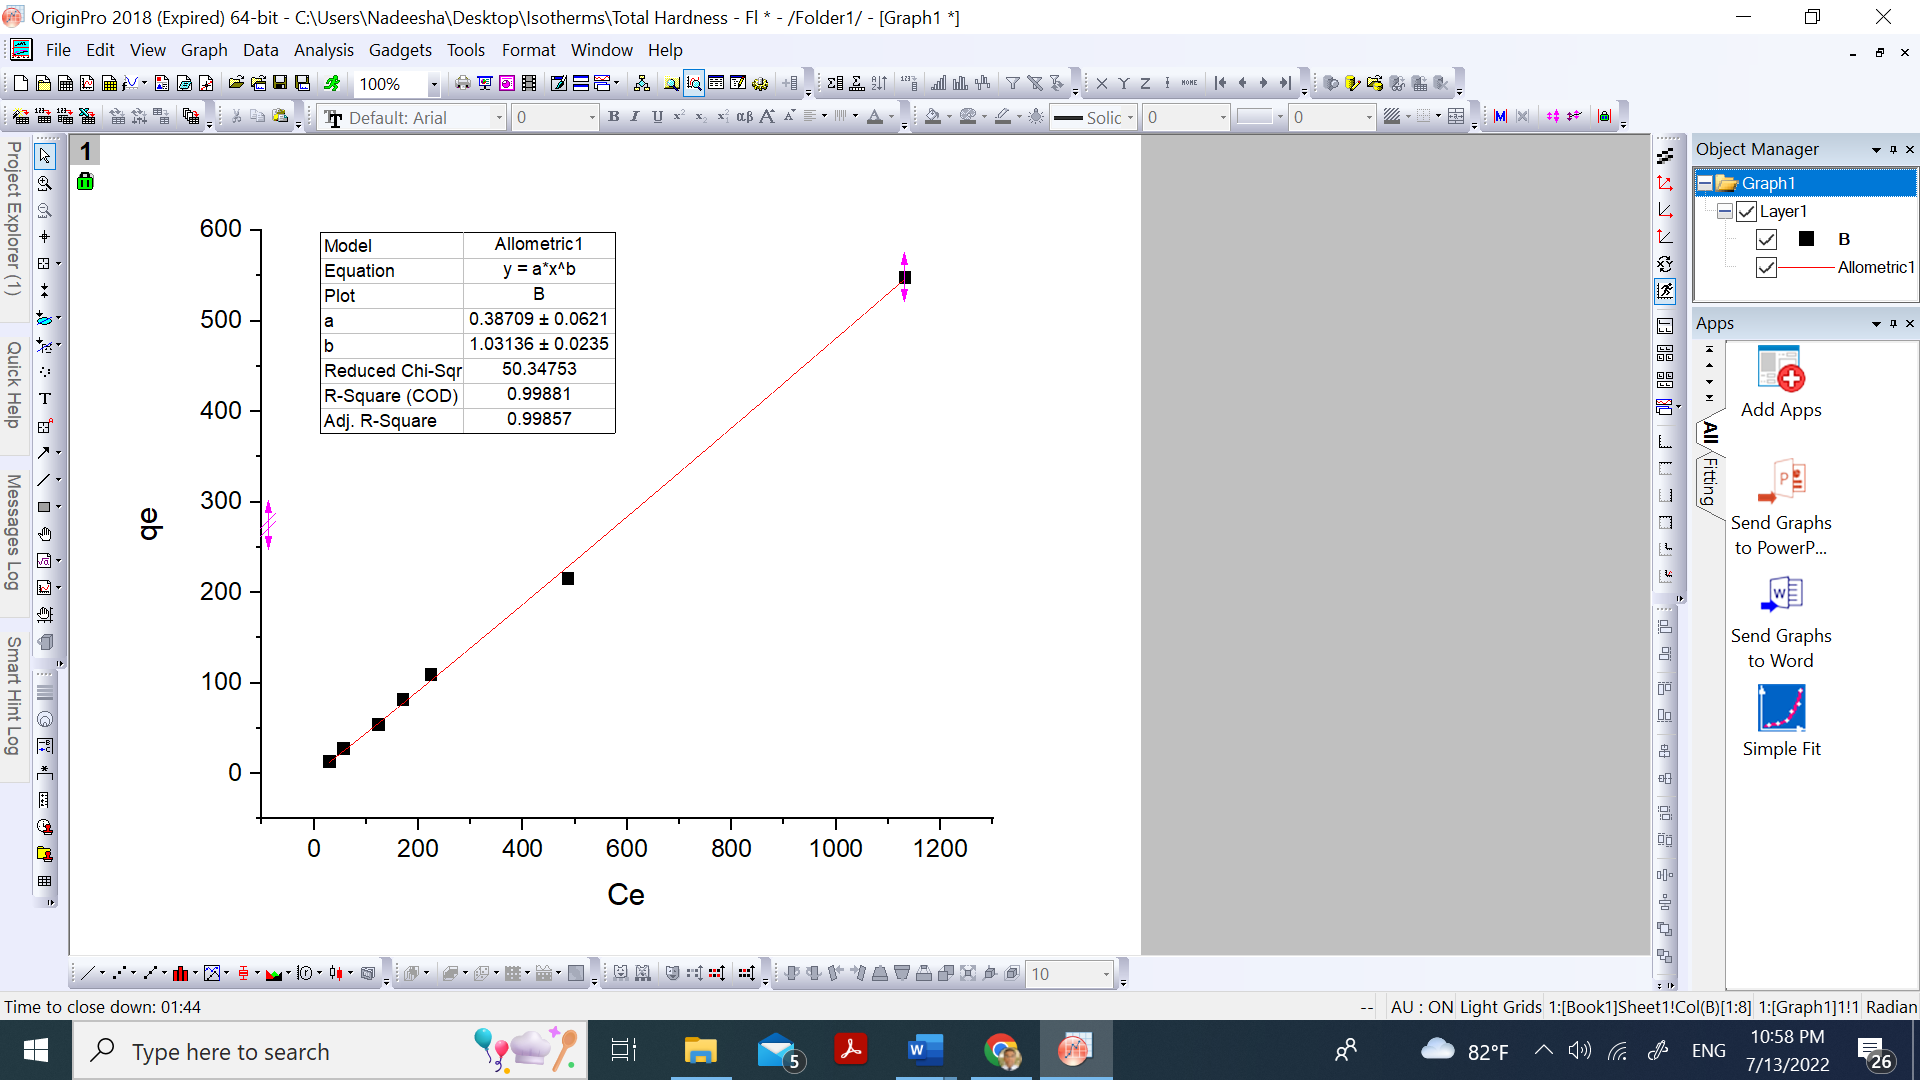
****Plot of qe vs. Ce for total hardness removal using on PA-ACSPC**

**For Calcium ions**

| **Ce** (**mg/L)** | **qe(mg/g)** |
| --- | --- |
| 1.74 | 2.4244 |
| 2.734 | 4.8898 |
| 5.1245 | 9.59185 |
| 7.883 | 14.2549 |
| 10.284 | 19.167 |
| 32.904 | 36.7939 |
| 91.2995 | 90.93435 |

**Plot of qe vs. Ce for Calcium ion removal using on PA-ACSPC**


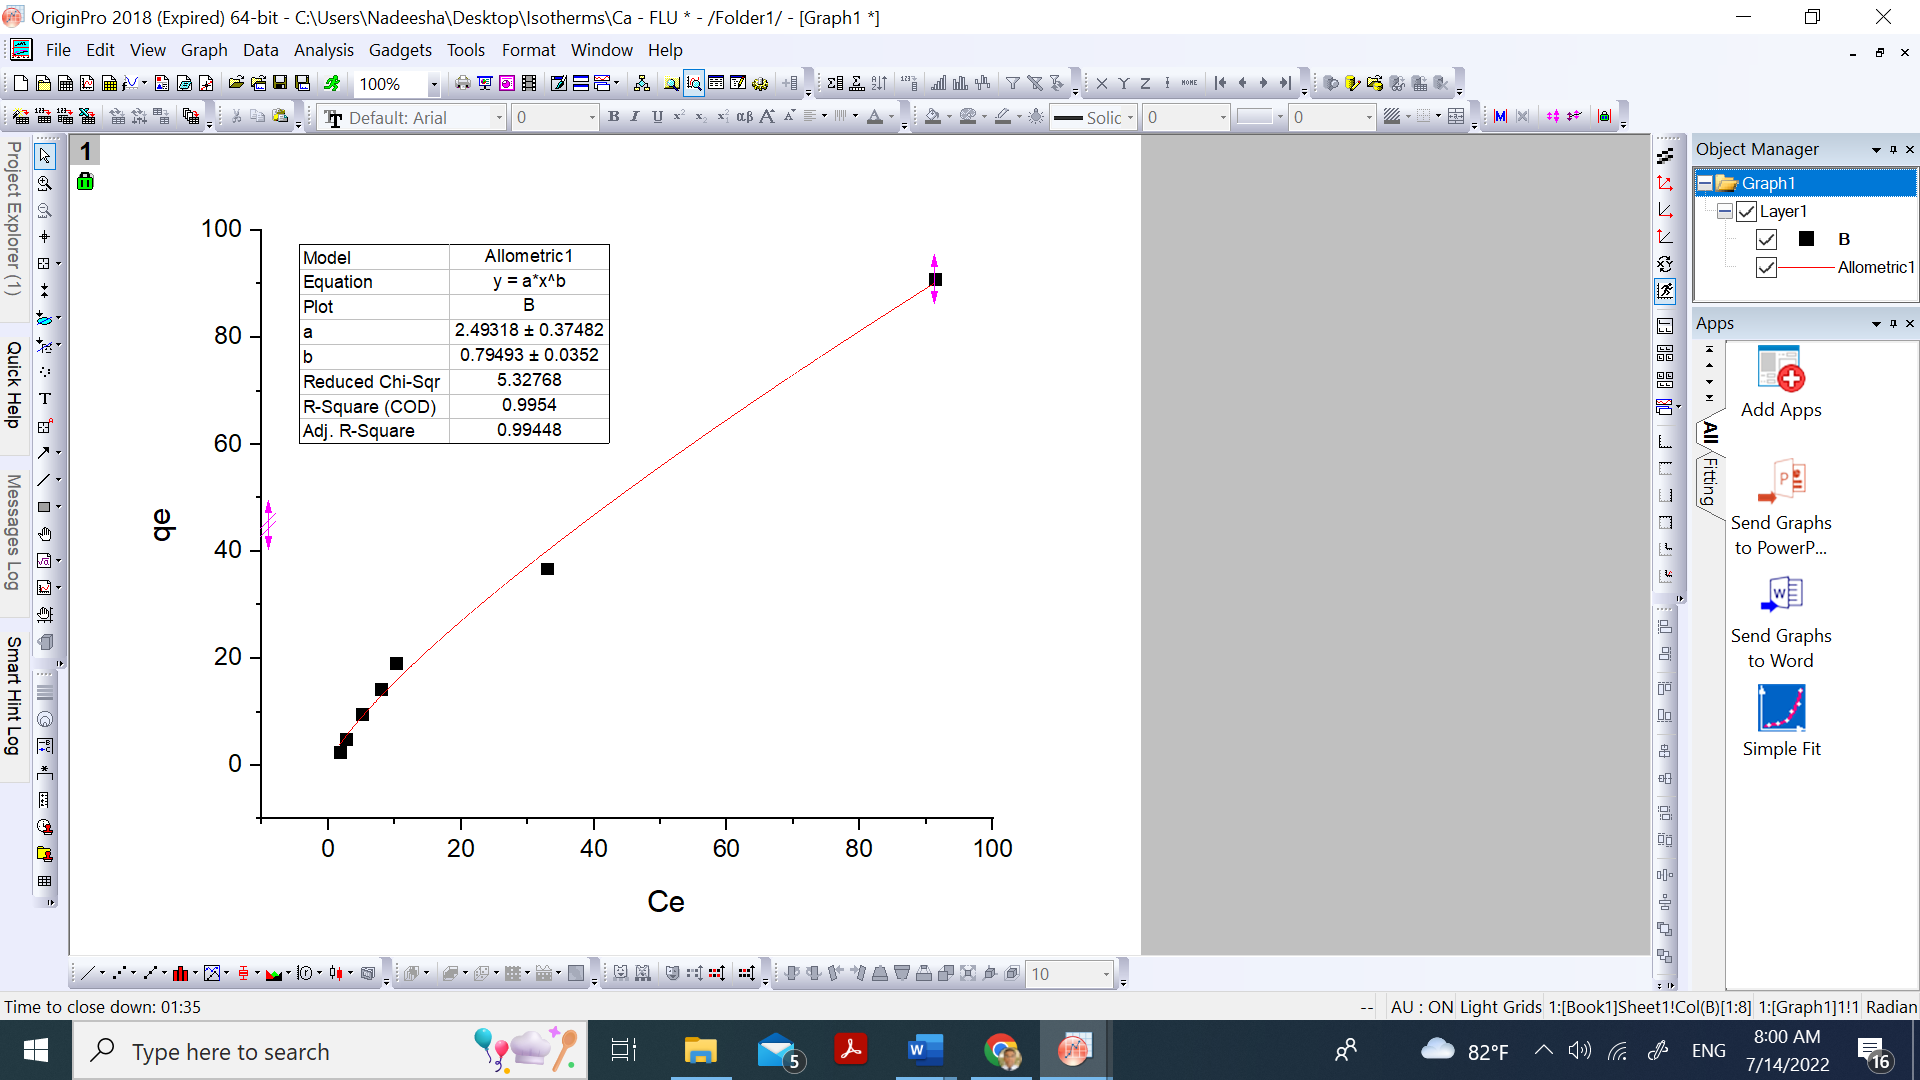


**For Magnesium ions**

| **Ce** (**mg/L)** | **qe(mg/g)** |
| --- | --- |
| 6.083 | 1.979 |
| 11.894 | 3.9327 |
| 23.402 | 7.7833 |
| 36.4685 | 11.32525 |
| 48.014 | 15.1611 |
| 97.958 | 30.2277 |
| 219.343 | 78.0749 |

**Plot of qe vs. Ce for Magnesium ion removal using on PA-ACSPC**


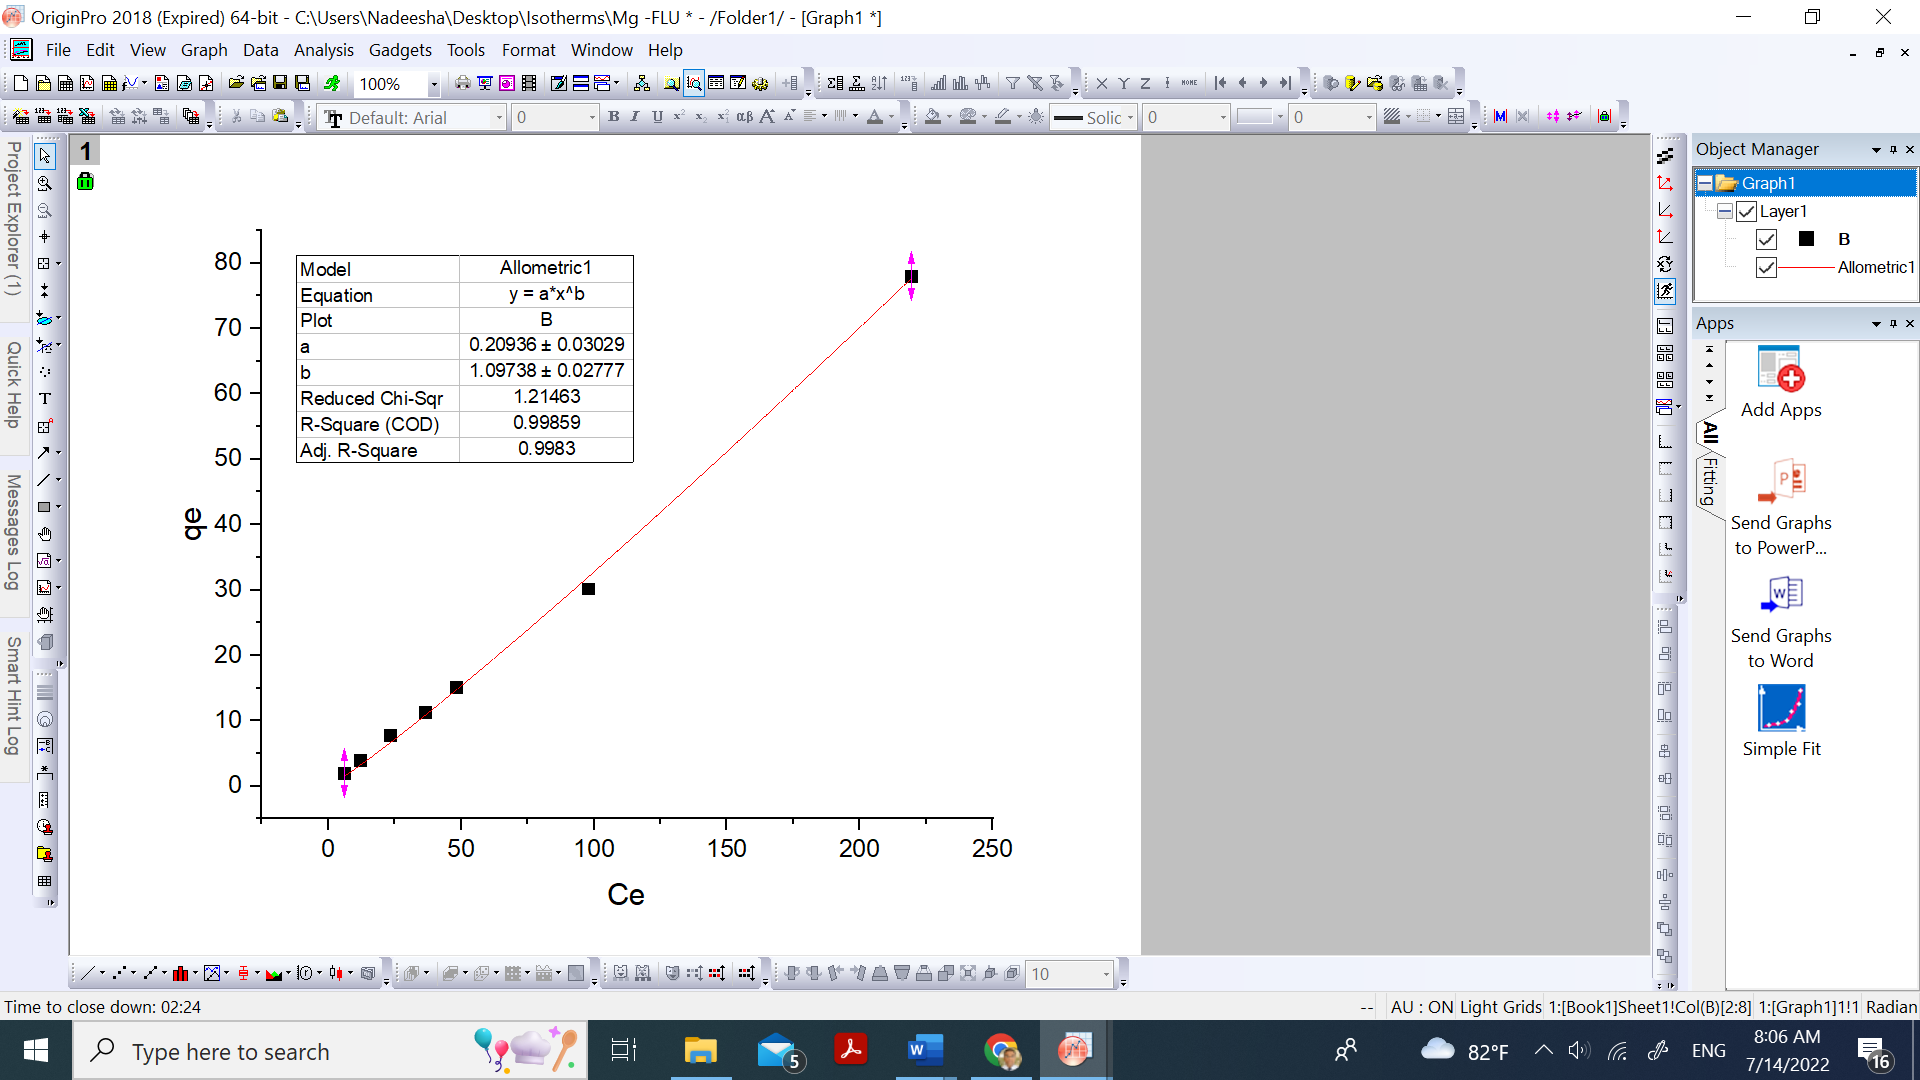


1. **Adsorption Thermodynamics parameters**


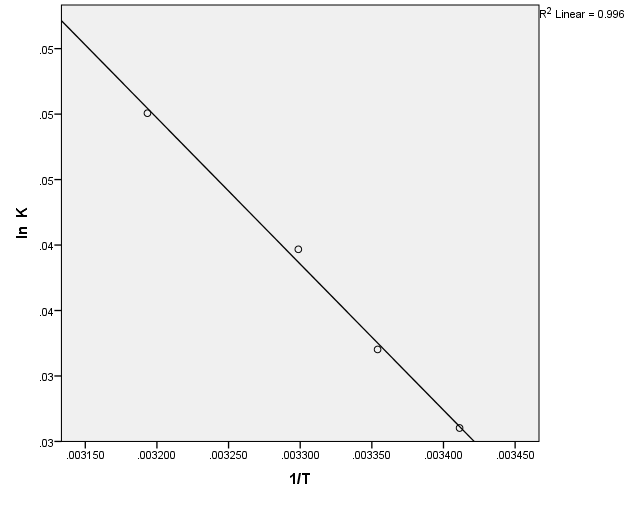

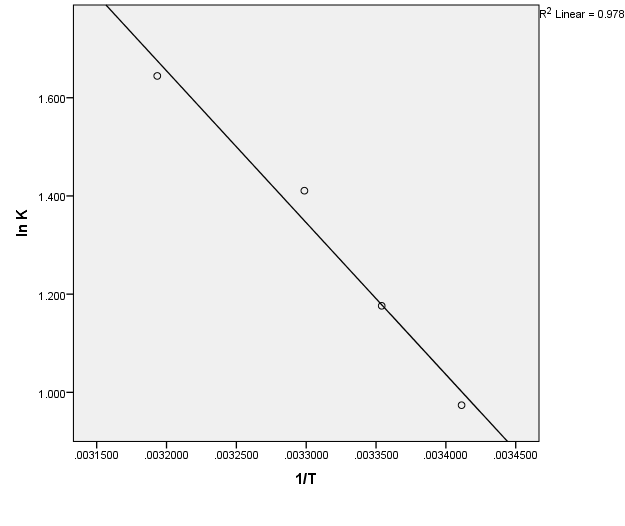


Ca

Hardness

Mg


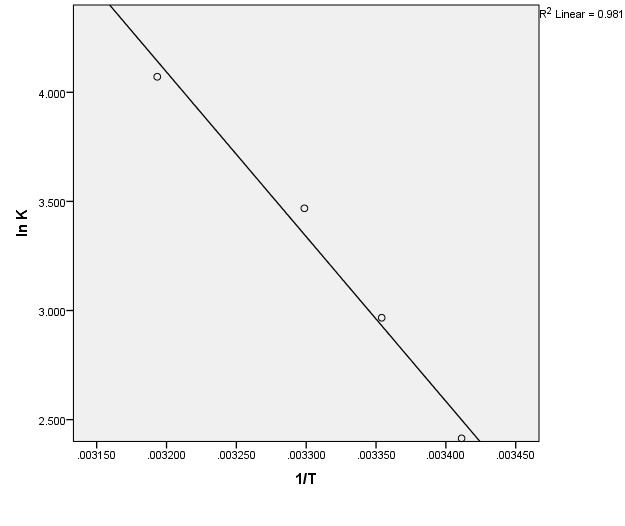


1. **Determination of Adsorption kinetic parameters**
2. **Pseudo-first order**


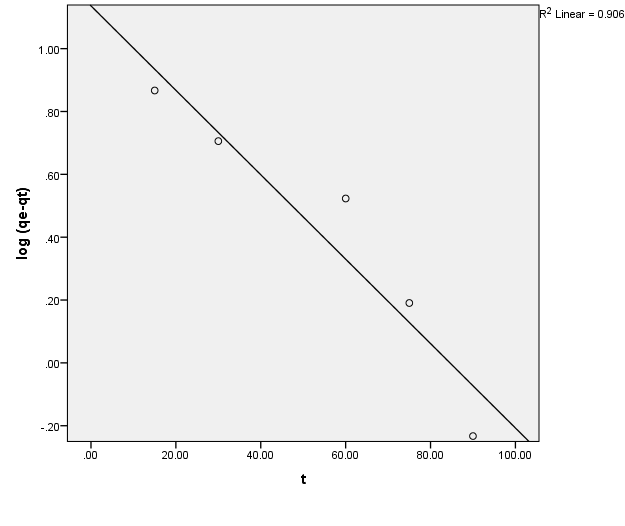

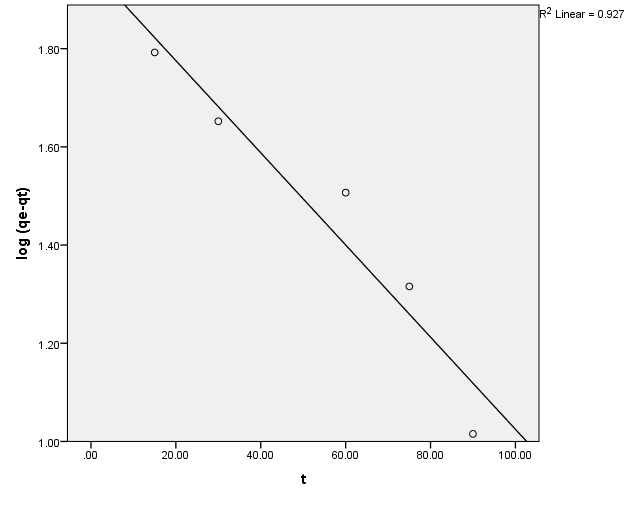


Ca

Hardness

Mg


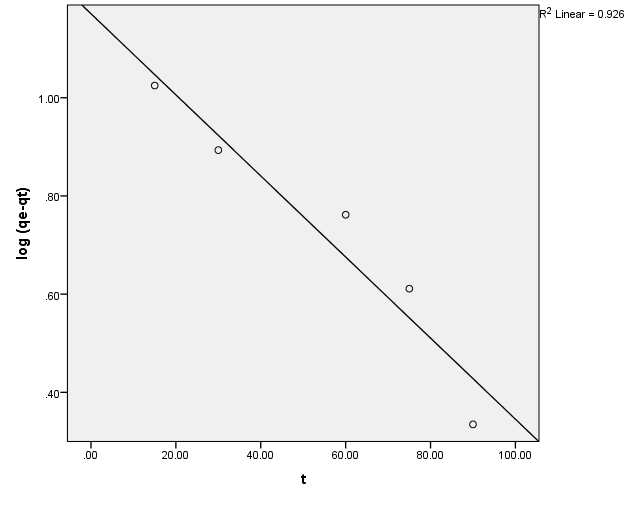


1. **Pseudo-second order**

Ca

Hardness

Mg


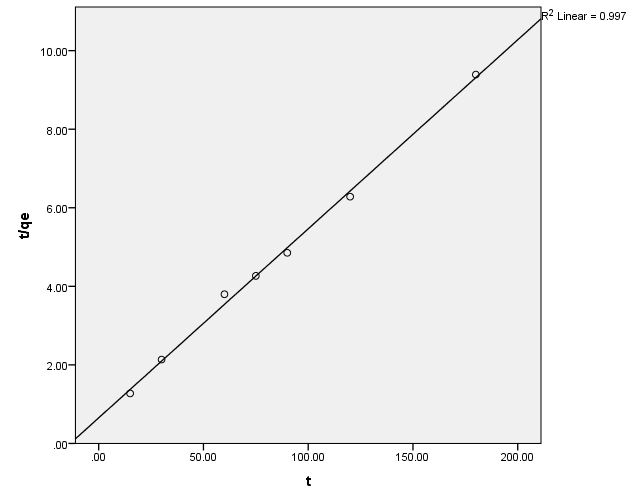

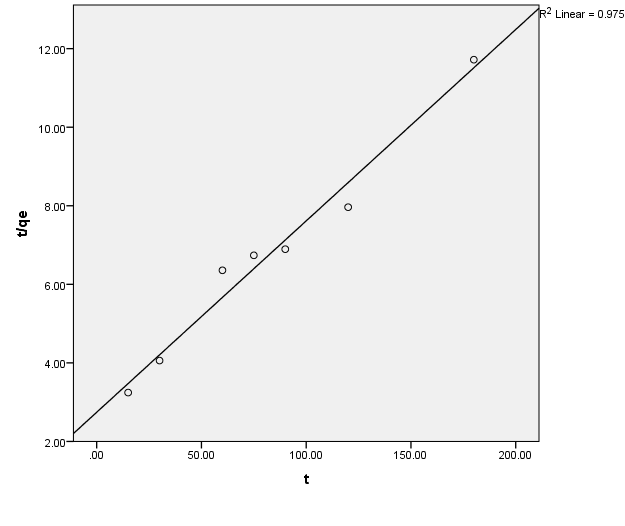

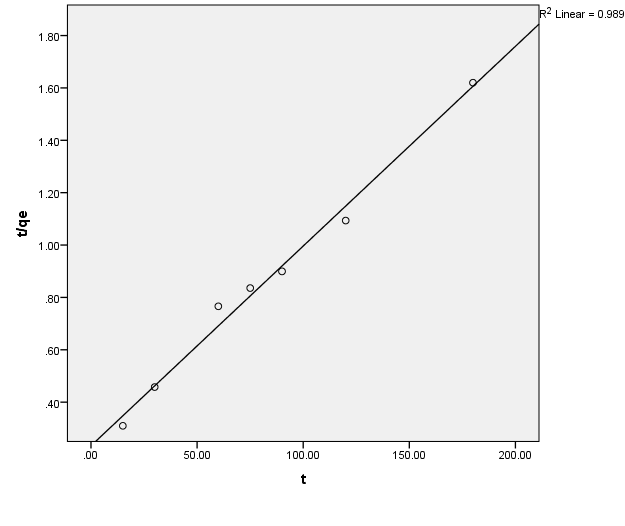

Supplement: f1 [file 3774106.f1.docx]
